# Supplementary material for: Manufacturing of urea co-crystals by spiral gas–solid two-phase flow (S-GSF) based on spiral jet mills: a continuous, solvent-free, and scalable mechanochemical method
Source: Royal Society of Chemistry journal article supplement (doi:10.1039/d3ce00833a), 2023-01-01
Supplement: d3ce00833a1.pdf [file d3ce00833a1.pdf]

## Supporting Information

# Manufacturing of urea co-crystal by spiral gas-solid two-phase flow(S-GSF) based on spiral jet mills: a continuous, solvent-free, and scalable mechanochemical method

Yong Song<sup>a</sup>, Zhiyuan Jin<sup>a</sup>, Jiawei Zhang<sup>a</sup>, Bo Jin<sup>a,\*</sup> and Rufang Peng<sup>a,\*</sup>

<sup>a</sup>State Key Laboratory of Environment-friendly Energy Materials, School of Materials and Chemistry, Southwest University of Science and Technology, Mianyang, 621010, China

\* Corresponding author. E-mail: jinbo0428@163.com; rfpeng2006@163.com

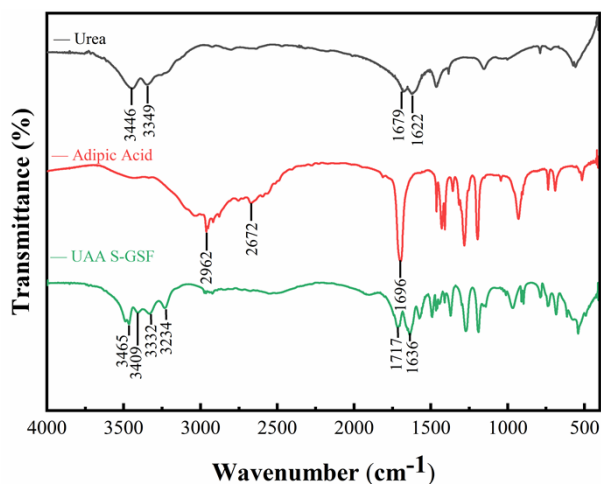

Figure. S1 FT-IR spectra of starting material and UAA co-crystal prepared by S-GSF.

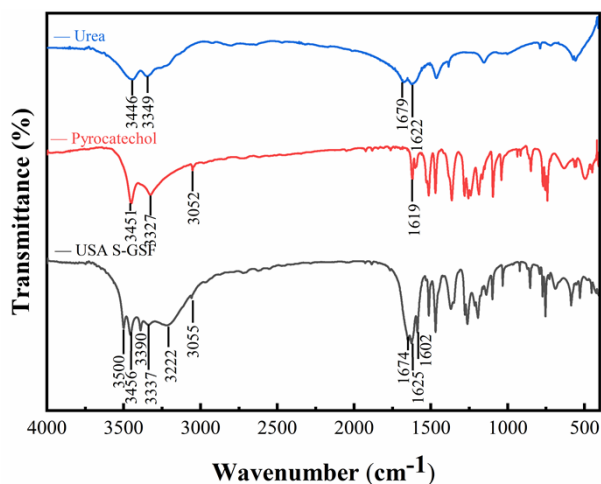

Figure. S2 FT-IR spectra of starting material and URCAT co-crystal prepared by S-GSF.

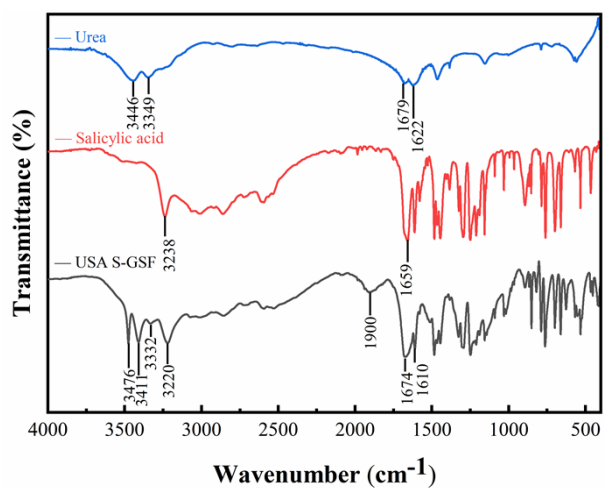

Figure. S3 FT-IR spectra of starting material and USA co-crystal prepared by S-GSF.

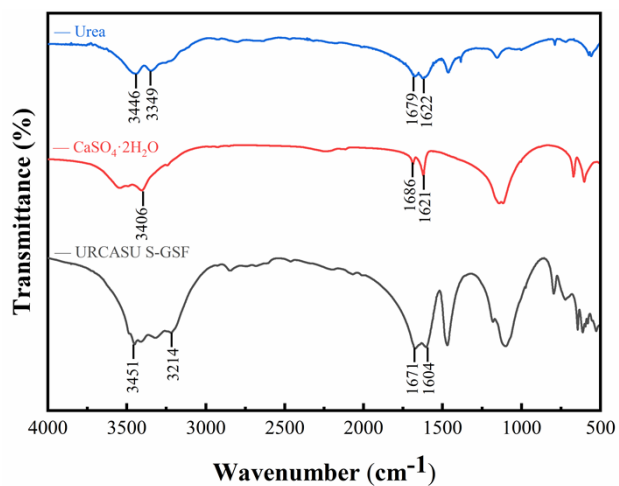

Figure. S4 FT-IR spectra of starting material and URCASU co-crystal prepared by S-GSF.
